# Supplementary material
Source: Frontiers journal article supplement (https://www.frontiersin.org/articles/157154)
Supplement: Appendix.PDF [file Appendix.PDF]

## APPENDIX

### **The Emotional Competence Inventory-University Version** (Boyatzis and Goleman, 2002)

**Self-Awareness** concerns knowing one's internal states, preferences, resources, and intuitions. The Self-Awareness cluster contains three competencies:

- Emotional Awareness: Recognizing one's emotions and their effects
- Accurate Self-Assessment: Knowing one's strengths and limits
- Self-Confidence: A strong sense of one's self-worth and capabilities

**Self-Management** refers to managing one's internal states, impulses, and resources. The Self-Management cluster contains seven competencies:

- Emotional Self-Control: Keeping disruptive emotions and impulses in check
- Trustworthiness: Maintaining integrity, acting congruently with one's values
- Conscientiousness: Taking responsibility for your personal performance
- Adaptability: Flexibility in handling change
- Achievement Orientation: Striving to improve or meeting a standard of excellence
- Initiative: Readiness to act on opportunities
- Optimism: Persistence in pursuing goals despite obstacles and setbacks

**Social Awareness** refers to how people handle relationships and awareness of others' feelings, needs, and concerns. The Social Awareness cluster contains three competencies:

- Empathy: Sensing others' feelings and perspectives, and taking an active interest in their concerns
- Organizational Awareness: Reading a group's emotional currents and power relationships
- Service Orientation: Anticipating, recognizing, and meeting customers' needs

We included a fourth competency, Cultural Awareness, presented in the previous version of ECI, namely appreciating and understanding people with different backgrounds and culture.

**Relationship Management** concerns the skill or adeptness at inducing desirable responses in others. The Relationship Management cluster contains eight competencies:

- Developing Others: Sensing others' development needs and bolstering their abilities
- Inspirational Leadership: Inspiring and guiding individuals and groups
- Change Catalyst: Initiating or managing change
- Influence: Wielding effective tactics for persuasion
- Conflict Management: Negotiating and resolving disagreements
- Teamwork: Working with others toward shared goals. Creating group synergy in pursuing collective goals
- Communication: Sending clear and convincing messages to an audience in an open and effective way
- Building Bonds: Developing and maintaining good relationships with a variety of people

**Cognitive competencies:** intellectual abilities that are related to people's effectiveness.

The Cognitive competencies cluster contains two competencies:

- Systems Thinking: Identifying the many and various factors that impact upon a complex situation or event
- Pattern Recognition: Recognizing patterns or trends in random information, events or situations
